# Supplementary material for: Association of Mindfulness-Based Interventions With Anxiety Severity in Adults With Cancer: A Systematic Review and Meta-analysis
Source: PubMed Central journal article supplement (PMC7414391; doi:10.1001/jamanetworkopen.2020.12598), 2020-08-07

## Supplementary Online Content

Oberoi S, Yang J, Woodgate RL, et al. Association of mindfulness-based interventions with anxiety severity in adults with cancer: a systematic review and meta-analysis. *JAMA Netw Open*. 2020;3(8):e2012598. doi:10.1001/jamanetworkopen.2020.12598

**eTable 1.** Search Strategy

**eTable 2.** Self-reported Anxiety Assessment Scales Used in the Included Trials (n=28)

**eTable 3.** Self-reported Depression Assessment Scales Used in the Included Trials (n=28)

**eTable 4.** Self-reported Health-related Quality of Life Assessment Scales Used in the Included Trials (n=28)

**eFigure 1.** Summary of the Risk of Bias of Studies Included in the Systematic Review (n= 28)

**eFigure 2.** Funnel Plot “Trim and Fill” Technique Assessing Publication Bias for Short-term Reduction in Severity of Anxiety

This supplementary material has been provided by the authors to give readers additional information about their work.

**eTable 1. Search strategy<sup>a</sup>**

|                                                                                                                                                                                                                                                                                                                                                                                                                                                                                                                                                                                                                                                                                                                                                                                                                                                                                                                                                                                                                                                                                                                                                                                                                                                                                                                                                                                                                                                                                                                                                                                                                                                                                                                                    |         |
|------------------------------------------------------------------------------------------------------------------------------------------------------------------------------------------------------------------------------------------------------------------------------------------------------------------------------------------------------------------------------------------------------------------------------------------------------------------------------------------------------------------------------------------------------------------------------------------------------------------------------------------------------------------------------------------------------------------------------------------------------------------------------------------------------------------------------------------------------------------------------------------------------------------------------------------------------------------------------------------------------------------------------------------------------------------------------------------------------------------------------------------------------------------------------------------------------------------------------------------------------------------------------------------------------------------------------------------------------------------------------------------------------------------------------------------------------------------------------------------------------------------------------------------------------------------------------------------------------------------------------------------------------------------------------------------------------------------------------------|---------|
| <b>Ovid</b>                                                                                                                                                                                                                                                                                                                                                                                                                                                                                                                                                                                                                                                                                                                                                                                                                                                                                                                                                                                                                                                                                                                                                                                                                                                                                                                                                                                                                                                                                                                                                                                                                                                                                                                        |         |
| exp neoplasms/                                                                                                                                                                                                                                                                                                                                                                                                                                                                                                                                                                                                                                                                                                                                                                                                                                                                                                                                                                                                                                                                                                                                                                                                                                                                                                                                                                                                                                                                                                                                                                                                                                                                                                                     | 3129461 |
| exp hematopoietic stem cell transplantation/ or stem cell transplantation/ or hematopoietic stem cell mobilization/                                                                                                                                                                                                                                                                                                                                                                                                                                                                                                                                                                                                                                                                                                                                                                                                                                                                                                                                                                                                                                                                                                                                                                                                                                                                                                                                                                                                                                                                                                                                                                                                                | 64127   |
| (cancer* or neoplas* or tumo?r* or malignan* or metasta* or oncogen* or oncolog* or hepatoma* or hepatoblastoma* or hepato-blastoma* or carcinoma* or adenoma? or adenocarcinoma? or adeno-carcinoma? or blastoma? or carcinosarcoma? or carcino-sarcoma? or leukemia? or leukaemia? or lymphoma? or melanoma? or mesenchymoma? or mesothelioma? or sarcoma? or thymoma?).tw,kf                                                                                                                                                                                                                                                                                                                                                                                                                                                                                                                                                                                                                                                                                                                                                                                                                                                                                                                                                                                                                                                                                                                                                                                                                                                                                                                                                    | 3477981 |
| (HSCT or ((h?ematopoietic or h?emato-poietic) adj3 (transplant* or sct or bct or mobili#ation)) or pbsct or pbct or psct or ((peripheral or pbse or pbscs) adj3 transplant*) or autohct or autopbsct or autopbsc or autopsc or cbsct or ((autologous or auto-logous or auto or allogeneic or allo-geneic or homologous or homo-logous) adj hct)).tw,kf                                                                                                                                                                                                                                                                                                                                                                                                                                                                                                                                                                                                                                                                                                                                                                                                                                                                                                                                                                                                                                                                                                                                                                                                                                                                                                                                                                             | 32738   |
| or/1-4                                                                                                                                                                                                                                                                                                                                                                                                                                                                                                                                                                                                                                                                                                                                                                                                                                                                                                                                                                                                                                                                                                                                                                                                                                                                                                                                                                                                                                                                                                                                                                                                                                                                                                                             | 4171187 |
| exp Anxiety/ or exp fear/                                                                                                                                                                                                                                                                                                                                                                                                                                                                                                                                                                                                                                                                                                                                                                                                                                                                                                                                                                                                                                                                                                                                                                                                                                                                                                                                                                                                                                                                                                                                                                                                                                                                                                          | 102154  |
| exp Anxiety Disorders/ or stress disorders, traumatic/ or psychological trauma/ or stress disorders, post-traumatic/ or stress disorders, traumatic, acute/ or exp phobic disorders/                                                                                                                                                                                                                                                                                                                                                                                                                                                                                                                                                                                                                                                                                                                                                                                                                                                                                                                                                                                                                                                                                                                                                                                                                                                                                                                                                                                                                                                                                                                                               | 103858  |
| (anxiet* or stress disorder* or psychological trauma* or ptsd or ptsds or moral injur* or post trauma* or posttrauma* or (stress* adj2 trauma*)).tw,kf                                                                                                                                                                                                                                                                                                                                                                                                                                                                                                                                                                                                                                                                                                                                                                                                                                                                                                                                                                                                                                                                                                                                                                                                                                                                                                                                                                                                                                                                                                                                                                             | 230041  |
| (anxious* or fear or fears or fearful* or nervous* or angst or apprehensi* or panic* or phobic or phobia*).tw,kf                                                                                                                                                                                                                                                                                                                                                                                                                                                                                                                                                                                                                                                                                                                                                                                                                                                                                                                                                                                                                                                                                                                                                                                                                                                                                                                                                                                                                                                                                                                                                                                                                   | 402553  |
| or/6-9                                                                                                                                                                                                                                                                                                                                                                                                                                                                                                                                                                                                                                                                                                                                                                                                                                                                                                                                                                                                                                                                                                                                                                                                                                                                                                                                                                                                                                                                                                                                                                                                                                                                                                                             | 658915  |
| exp mind-body therapies/ or exp musculoskeletal manipulations/ or exp exercise movement techniques/ or exp spiritual therapies/ or exp acupuncture therapy/                                                                                                                                                                                                                                                                                                                                                                                                                                                                                                                                                                                                                                                                                                                                                                                                                                                                                                                                                                                                                                                                                                                                                                                                                                                                                                                                                                                                                                                                                                                                                                        | 89741   |
| ((mind? adj1 body) or acupunctur* or acupotom* or electroacupunctur* or electro-acupunctur* or moxibustion or moxabustion or shaman* or witch* or sorcer* or radiesthesi* or aroma therap* or aromatherap* or (essential adj2 oil*) or bio-feedback* or myo-feedback* or psycho-physiologic feedback* or neuro-feedback* or biofeedback* or myofeedback* or psychophysiologic feedback* or neurofeedback* or alpha feedback* or brainwave feedback* or qigong or qi gong or ch'i kung or ((breath* or coping or respiratory) adj2 (exercise* or technique* or train*)) or relax* or hypnos#s or hypnotherap* or hypno-therap* or hypnotism or autogenic training or self-hypno* or imagery or reverie or laughter or laughing or meditat* or mindful* or psychodrama* or psycho-drama* or tai chi or tai ji or taiji or therapeutic touch* or healing touch* or reiki or yoga or energy therap* or ((musculoskeletal* or musculo-skeletal* or orthop?edic* or osteopathic* or spinal* or cervical* or lumbar*) adj2 manipul*) or ((manipulat* or manual) adj2 therap*) or chiropractic* or soft tissue therap* or acupressure* or chih ya or shiatsu or shiatzu or zhi ya or bodywork* or massag* or rolfing or zone therap* or reflex therap* or reflexolog* or reflexotherap* or reflexo-therap* or manual lymph* or ((spiritual or faith or mental* or religion* or religious*) adj3 (healing or heal or healed or heals)) or prayer* or magic* or body align* or pilates or movement technique* or alexander technique* or feldenkrais or structural integration* or trager approach* or psycho-physical integration* or psychophysical integration* or mentastic* or ((art or music) adj3 therap*) or dance or dancing).tw,kf | 302728  |
| or/11-12                                                                                                                                                                                                                                                                                                                                                                                                                                                                                                                                                                                                                                                                                                                                                                                                                                                                                                                                                                                                                                                                                                                                                                                                                                                                                                                                                                                                                                                                                                                                                                                                                                                                                                                           | 342288  |
| randomized controlled trial.pt                                                                                                                                                                                                                                                                                                                                                                                                                                                                                                                                                                                                                                                                                                                                                                                                                                                                                                                                                                                                                                                                                                                                                                                                                                                                                                                                                                                                                                                                                                                                                                                                                                                                                                     | 475636  |
| controlled clinical trial.pt                                                                                                                                                                                                                                                                                                                                                                                                                                                                                                                                                                                                                                                                                                                                                                                                                                                                                                                                                                                                                                                                                                                                                                                                                                                                                                                                                                                                                                                                                                                                                                                                                                                                                                       | 92894   |
| Clinical Trials as topic/                                                                                                                                                                                                                                                                                                                                                                                                                                                                                                                                                                                                                                                                                                                                                                                                                                                                                                                                                                                                                                                                                                                                                                                                                                                                                                                                                                                                                                                                                                                                                                                                                                                                                                          | 185927  |
| ((singl* or doubl* or trebl* or tripl*) adj (blind* or dumm* or mask*)).tw,kf                                                                                                                                                                                                                                                                                                                                                                                                                                                                                                                                                                                                                                                                                                                                                                                                                                                                                                                                                                                                                                                                                                                                                                                                                                                                                                                                                                                                                                                                                                                                                                                                                                                      | 161803  |
| PLACEBOS/                                                                                                                                                                                                                                                                                                                                                                                                                                                                                                                                                                                                                                                                                                                                                                                                                                                                                                                                                                                                                                                                                                                                                                                                                                                                                                                                                                                                                                                                                                                                                                                                                                                                                                                          | 34216   |
| (placebo* or sham).tw,kf                                                                                                                                                                                                                                                                                                                                                                                                                                                                                                                                                                                                                                                                                                                                                                                                                                                                                                                                                                                                                                                                                                                                                                                                                                                                                                                                                                                                                                                                                                                                                                                                                                                                                                           | 278392  |

|                                                                                                                                                                                                                                                                                                                                                                                                                                                                                                                                                                                                                                                                                                                                                                                                                                                                                                                                                                                                                                                                                                                                                                                                                                                                                                                                                                                                                                                                                                                                                                                                                                                                                                                                                                                                                                                                                                              |         |
|--------------------------------------------------------------------------------------------------------------------------------------------------------------------------------------------------------------------------------------------------------------------------------------------------------------------------------------------------------------------------------------------------------------------------------------------------------------------------------------------------------------------------------------------------------------------------------------------------------------------------------------------------------------------------------------------------------------------------------------------------------------------------------------------------------------------------------------------------------------------------------------------------------------------------------------------------------------------------------------------------------------------------------------------------------------------------------------------------------------------------------------------------------------------------------------------------------------------------------------------------------------------------------------------------------------------------------------------------------------------------------------------------------------------------------------------------------------------------------------------------------------------------------------------------------------------------------------------------------------------------------------------------------------------------------------------------------------------------------------------------------------------------------------------------------------------------------------------------------------------------------------------------------------|---------|
| (randomized or randomised or randomly or rct).tw,kf                                                                                                                                                                                                                                                                                                                                                                                                                                                                                                                                                                                                                                                                                                                                                                                                                                                                                                                                                                                                                                                                                                                                                                                                                                                                                                                                                                                                                                                                                                                                                                                                                                                                                                                                                                                                                                                          | 804608  |
| trial.ti                                                                                                                                                                                                                                                                                                                                                                                                                                                                                                                                                                                                                                                                                                                                                                                                                                                                                                                                                                                                                                                                                                                                                                                                                                                                                                                                                                                                                                                                                                                                                                                                                                                                                                                                                                                                                                                                                                     | 193712  |
| or/14-21                                                                                                                                                                                                                                                                                                                                                                                                                                                                                                                                                                                                                                                                                                                                                                                                                                                                                                                                                                                                                                                                                                                                                                                                                                                                                                                                                                                                                                                                                                                                                                                                                                                                                                                                                                                                                                                                                                     | 1311132 |
| 5 and 10 and 13 and 22                                                                                                                                                                                                                                                                                                                                                                                                                                                                                                                                                                                                                                                                                                                                                                                                                                                                                                                                                                                                                                                                                                                                                                                                                                                                                                                                                                                                                                                                                                                                                                                                                                                                                                                                                                                                                                                                                       | 590     |
| exp animals/ not humans/                                                                                                                                                                                                                                                                                                                                                                                                                                                                                                                                                                                                                                                                                                                                                                                                                                                                                                                                                                                                                                                                                                                                                                                                                                                                                                                                                                                                                                                                                                                                                                                                                                                                                                                                                                                                                                                                                     | 4543138 |
| 23 not 24                                                                                                                                                                                                                                                                                                                                                                                                                                                                                                                                                                                                                                                                                                                                                                                                                                                                                                                                                                                                                                                                                                                                                                                                                                                                                                                                                                                                                                                                                                                                                                                                                                                                                                                                                                                                                                                                                                    | 587     |
| <b>CENTRAL</b>                                                                                                                                                                                                                                                                                                                                                                                                                                                                                                                                                                                                                                                                                                                                                                                                                                                                                                                                                                                                                                                                                                                                                                                                                                                                                                                                                                                                                                                                                                                                                                                                                                                                                                                                                                                                                                                                                               |         |
| [mh neoplasms]                                                                                                                                                                                                                                                                                                                                                                                                                                                                                                                                                                                                                                                                                                                                                                                                                                                                                                                                                                                                                                                                                                                                                                                                                                                                                                                                                                                                                                                                                                                                                                                                                                                                                                                                                                                                                                                                                               | 67536   |
| [mh "hematopoietic stem cell transplantation"] or [mh ^"stem cell transplantation"] or [mh ^"hematopoietic stem cell mobilization"]                                                                                                                                                                                                                                                                                                                                                                                                                                                                                                                                                                                                                                                                                                                                                                                                                                                                                                                                                                                                                                                                                                                                                                                                                                                                                                                                                                                                                                                                                                                                                                                                                                                                                                                                                                          | 1730    |
| (cancer* or neoplas* or tumo?r* or malignan* or metasta* or oncogen* or oncolog* or hepatoma* or hepatoblastoma* or hepato-blastoma* or carcinoma* or adenoma* or adenocarcinoma* or adeno-carcinoma* or blastoma* or carcinosarcoma* or carcino-sarcoma* or leukemia* or leukaemia* or lymphoma* or melanoma* or mesenchymoma* or mesothelioma* or sarcoma* or thymoma*):ti,ab,kw                                                                                                                                                                                                                                                                                                                                                                                                                                                                                                                                                                                                                                                                                                                                                                                                                                                                                                                                                                                                                                                                                                                                                                                                                                                                                                                                                                                                                                                                                                                           | 113392  |
| (HSCt or ((h?ematopoietic or h?emato-poietic) NEAR/3 (transplant* or sct or bct or mobili#ation)) or pbsct or pbct or psct or ((peripheral or pbsc or pbscs) NEAR/3 transplant*) or autohct or autopbsct or autopbsc or autopsc or cbsct or ((autologous or auto-logous or auto or allogeneic or allo-geneic or homologous or homo-logous) NEXT hct)):ti,ab,kw                                                                                                                                                                                                                                                                                                                                                                                                                                                                                                                                                                                                                                                                                                                                                                                                                                                                                                                                                                                                                                                                                                                                                                                                                                                                                                                                                                                                                                                                                                                                               | 3235    |
| {OR #1-#4}                                                                                                                                                                                                                                                                                                                                                                                                                                                                                                                                                                                                                                                                                                                                                                                                                                                                                                                                                                                                                                                                                                                                                                                                                                                                                                                                                                                                                                                                                                                                                                                                                                                                                                                                                                                                                                                                                                   | 138851  |
| [mh Anxiety] or [mh fear]                                                                                                                                                                                                                                                                                                                                                                                                                                                                                                                                                                                                                                                                                                                                                                                                                                                                                                                                                                                                                                                                                                                                                                                                                                                                                                                                                                                                                                                                                                                                                                                                                                                                                                                                                                                                                                                                                    | 7972    |
| [mh "Anxiety Disorders"] or [mh ^"stress disorders, traumatic"] or [mh ^"psychological trauma"] or [mh ^"stress disorders, post-traumatic"] or [mh ^"stress disorders, traumatic, acute"] or [mh "phobic disorders"]                                                                                                                                                                                                                                                                                                                                                                                                                                                                                                                                                                                                                                                                                                                                                                                                                                                                                                                                                                                                                                                                                                                                                                                                                                                                                                                                                                                                                                                                                                                                                                                                                                                                                         | 7925    |
| (anxiet* or "psychological trauma" or ptsd or ptsds or (moral NEXT injur*) or (post NEXT trauma*) or posttrauma* or (stress* NEAR/2 (trauma* or disorder*)):ti,ab,kw                                                                                                                                                                                                                                                                                                                                                                                                                                                                                                                                                                                                                                                                                                                                                                                                                                                                                                                                                                                                                                                                                                                                                                                                                                                                                                                                                                                                                                                                                                                                                                                                                                                                                                                                         | 38931   |
| (anxious* or fear or fears or fearful* or nervous* or angst or apprehensi* or panic* or phobic or phobia*):ti,ab,kw                                                                                                                                                                                                                                                                                                                                                                                                                                                                                                                                                                                                                                                                                                                                                                                                                                                                                                                                                                                                                                                                                                                                                                                                                                                                                                                                                                                                                                                                                                                                                                                                                                                                                                                                                                                          | 29413   |
| {OR #6-#9}                                                                                                                                                                                                                                                                                                                                                                                                                                                                                                                                                                                                                                                                                                                                                                                                                                                                                                                                                                                                                                                                                                                                                                                                                                                                                                                                                                                                                                                                                                                                                                                                                                                                                                                                                                                                                                                                                                   | 62595   |
| [mh "mind-body therapies"] or [mh "musculoskeletal manipulations"] or [mh "exercise movement techniques"] or [mh "spiritual therapies"] or [mh "acupuncture therapy"]                                                                                                                                                                                                                                                                                                                                                                                                                                                                                                                                                                                                                                                                                                                                                                                                                                                                                                                                                                                                                                                                                                                                                                                                                                                                                                                                                                                                                                                                                                                                                                                                                                                                                                                                        | 11880   |
| ((mind? NEAR/1 body) or acupunctur* or acupotom* or electroacupunctur* or electro-acupunctur* or moxibustion or moxabustion or shaman* or witch* or sorcer* or radiesthesi* or (aroma NEXT therap*) or aromatherap* or (essential NEAR/2 oil*) or bio-feedback* or myo-feedback* or (psycho-physiologic NEXT feedback*) or neuro-feedback* or biofeedback* or myofeedback* or (psychophysiological NEXT feedback*) or neurofeedback* or (alpha NEXT feedback*) or (brainwave NEXT feedback*) or qigong or "qi gong" or "ch'i kung" or ((breath* or coping or respiratory) NEAR/2 (exercise* or technique* or train*)) or relax* or hypnosis or hypnotherap* or hypno-therap* or hypnotism or "autogenic training" or self-hypno* or imagery or reverie or laughter or laughing or meditat* or mindful* or psychodrama* or psycho-drama* or "tai chi" or "tai ji" or taiji or (therapeutic NEXT touch*) or (healing NEXT touch*) or reiki or yoga or (energy NEXT therap*) or ((musculoskeletal* or musculo-skeletal* or orthopaedic* or orthopedic* or osteopathic* or spinal* or cervical* or lumbar*) NEAR/2 manipul*) or ((manipulat* or manual) NEAR/2 therap*) or chiropractic* or "soft tissue therapy" or acupressure* or "chih ya" or shiatsu or shiatzu or "zhi ya" or bodywork* or massag* or rolfing or (zone NEXT therap*) or (reflex NEXT therap*) or reflexolog* or reflexotherap* or reflexo-therap* or (manual NEXT lymph*) or ((spiritual or faith or mental* or religion* or religious*) NEAR/3 (healing or heal or healed or heals)) or prayer* or magic* or (body NEXT align*) or pilates or (movement NEXT technique*) or (alexander NEXT technique*) or feldenkrais or (structural NEXT integration*) or "trager approach" or (psycho-physical NEXT integration*) or (psychophysical NEXT integration*) or mentastic* or ((art or music) NEAR/3 therap*) or dance or dancing):ti,ab,kw | 46441   |
| {OR #11-#12}                                                                                                                                                                                                                                                                                                                                                                                                                                                                                                                                                                                                                                                                                                                                                                                                                                                                                                                                                                                                                                                                                                                                                                                                                                                                                                                                                                                                                                                                                                                                                                                                                                                                                                                                                                                                                                                                                                 | 47060   |

|                                                                                                                                                                                                                                                                                                                                                                                                                                                                                                                                                                                                                                                                                                                                                                                                                                                                                                                                                                                                                                                                                                                                                                                                                                                                                                                                                                                                                                                                                                                                                                                                                                                                                                                                |        |
|--------------------------------------------------------------------------------------------------------------------------------------------------------------------------------------------------------------------------------------------------------------------------------------------------------------------------------------------------------------------------------------------------------------------------------------------------------------------------------------------------------------------------------------------------------------------------------------------------------------------------------------------------------------------------------------------------------------------------------------------------------------------------------------------------------------------------------------------------------------------------------------------------------------------------------------------------------------------------------------------------------------------------------------------------------------------------------------------------------------------------------------------------------------------------------------------------------------------------------------------------------------------------------------------------------------------------------------------------------------------------------------------------------------------------------------------------------------------------------------------------------------------------------------------------------------------------------------------------------------------------------------------------------------------------------------------------------------------------------|--------|
| #5 and #10 and #13                                                                                                                                                                                                                                                                                                                                                                                                                                                                                                                                                                                                                                                                                                                                                                                                                                                                                                                                                                                                                                                                                                                                                                                                                                                                                                                                                                                                                                                                                                                                                                                                                                                                                                             | 605    |
| <b>PsycINFO</b>                                                                                                                                                                                                                                                                                                                                                                                                                                                                                                                                                                                                                                                                                                                                                                                                                                                                                                                                                                                                                                                                                                                                                                                                                                                                                                                                                                                                                                                                                                                                                                                                                                                                                                                |        |
| exp neoplasms/                                                                                                                                                                                                                                                                                                                                                                                                                                                                                                                                                                                                                                                                                                                                                                                                                                                                                                                                                                                                                                                                                                                                                                                                                                                                                                                                                                                                                                                                                                                                                                                                                                                                                                                 | 48144  |
| stem cells/                                                                                                                                                                                                                                                                                                                                                                                                                                                                                                                                                                                                                                                                                                                                                                                                                                                                                                                                                                                                                                                                                                                                                                                                                                                                                                                                                                                                                                                                                                                                                                                                                                                                                                                    | 3963   |
| (cancer* or neoplas* or tumor* or malignan* or metasta* or oncogen* or oncolog* or hepatoma* or hepatoblastoma* or hepato-blastoma* or carcinoma* or adenoma? or adenocarcinoma? or adeno-carcinoma? or blastoma? or carcinosarcoma? or carcino-sarcoma? or leukemia? or leukaemia? or lymphoma? or melanoma? or mesenchymoma? or mesothelioma? or sarcoma? or thymoma?).tw                                                                                                                                                                                                                                                                                                                                                                                                                                                                                                                                                                                                                                                                                                                                                                                                                                                                                                                                                                                                                                                                                                                                                                                                                                                                                                                                                    | 80135  |
| (H SCT or ((h?ematopoietic or h?emato-poietic) adj3 (transplant* or sct or bct or mobili#ation)) or pbsct or pbct or psct or ((peripheral or pbsc or pbscs) adj3 transplant*) or autohct or autopsct or autopbsc or autopsc or cbct or ((autologous or auto-logous or auto or allogeneic or allo-geneic or homologous or homo-logous) adj hct)).tw                                                                                                                                                                                                                                                                                                                                                                                                                                                                                                                                                                                                                                                                                                                                                                                                                                                                                                                                                                                                                                                                                                                                                                                                                                                                                                                                                                             | 569    |
| or/1-4                                                                                                                                                                                                                                                                                                                                                                                                                                                                                                                                                                                                                                                                                                                                                                                                                                                                                                                                                                                                                                                                                                                                                                                                                                                                                                                                                                                                                                                                                                                                                                                                                                                                                                                         | 84879  |
| exp Anxiety/ or exp fear/ or anxiety management/                                                                                                                                                                                                                                                                                                                                                                                                                                                                                                                                                                                                                                                                                                                                                                                                                                                                                                                                                                                                                                                                                                                                                                                                                                                                                                                                                                                                                                                                                                                                                                                                                                                                               | 82341  |
| exp Anxiety Disorders/                                                                                                                                                                                                                                                                                                                                                                                                                                                                                                                                                                                                                                                                                                                                                                                                                                                                                                                                                                                                                                                                                                                                                                                                                                                                                                                                                                                                                                                                                                                                                                                                                                                                                                         | 78557  |
| (anxiet* or stress disorder* or psychological trauma* or ptsd or ptsds or moral injur* or post trauma* or posttrauma* or (stress* adj2 trauma*)).tw                                                                                                                                                                                                                                                                                                                                                                                                                                                                                                                                                                                                                                                                                                                                                                                                                                                                                                                                                                                                                                                                                                                                                                                                                                                                                                                                                                                                                                                                                                                                                                            | 230399 |
| (anxious* or fear or fears or fearful* or nervous* or angst or apprehensi* or panic* or phobic or phobia*).tw                                                                                                                                                                                                                                                                                                                                                                                                                                                                                                                                                                                                                                                                                                                                                                                                                                                                                                                                                                                                                                                                                                                                                                                                                                                                                                                                                                                                                                                                                                                                                                                                                  | 189885 |
| or/6-9                                                                                                                                                                                                                                                                                                                                                                                                                                                                                                                                                                                                                                                                                                                                                                                                                                                                                                                                                                                                                                                                                                                                                                                                                                                                                                                                                                                                                                                                                                                                                                                                                                                                                                                         | 385720 |
| mind body therapy/ or movement therapy/ or acupuncture/ or aromatherapy/ or exp biofeedback/ or exp relaxation therapy/ or autogenic training/ or witchcraft/ or exp religious practices/ or shamanism/ or mindfulness/ or hypnosis/ or exp hypnotherapy/ or autohypnosis/ or guided imagery/ or laughter/ or exp humor/ or psychodrama/ or massage/ or exp creative arts therapy/                                                                                                                                                                                                                                                                                                                                                                                                                                                                                                                                                                                                                                                                                                                                                                                                                                                                                                                                                                                                                                                                                                                                                                                                                                                                                                                                             | 60894  |
| ((mind? adj1 body) or acupunctur* or acupotom* or electroacupunctur* or electro-acupunctur* or moxibustion or moxabustion or shaman* or witch* or sorcer* or radiesthesi* or aroma therap* or aromatherap* or (essential adj2 oil*) or bio-feedback* or myo-feedback* or psycho-physiologic feedback* or neuro-feedback* or biofeedback* or myofeedback* or psychophysilogic feedback* or neurofeedback* or alpha feedback* or brainwave feedback* or qigong or qi gong or ch'i kung or ((breath* or coping or respiratory) adj2 (exercise* or technique* or train*)) or relax* or hypnos#s or hypnotherap* or hypno-therap* or hypnotism or autogenic training or self-hypno* or imagery or reverie or laughter or laughing or meditat* or mindful* or psychodrama* or psycho-drama* or tai chi or tai ji or taiji or therapeutic touch* or healing touch* or reiki or yoga or energy therap* or ((musculoskeletal* or musculo-skeletal* or orthop?edic* or osteopathic* or spinal* or cervical* or lumbar*) adj2 manipul*) or ((manipulat* or manual) adj2 therap*) or chiropractic* or soft tissue therap* or acupressure* or chih ya or shiatsu or shiatzu or zhi ya or bodywork* or massag* or rolfing or zone therap* or reflex therap* or reflexolog* or reflexotherap* or reflexo-therap* or manual lymph* or ((spiritual or faith or mental* or religion* or religious*) adj3 (healing or heal or healed or heals)) or prayer* or magic* or body align* or pilates or movement technique* or alexander technique* or feldenkrais or structural integration* or trager approach* or psycho-physical integration* or psychophysical integration* or mentastic* or ((art or music) adj3 therap*) or dance or dancing).tw | 123120 |
| or/11-12                                                                                                                                                                                                                                                                                                                                                                                                                                                                                                                                                                                                                                                                                                                                                                                                                                                                                                                                                                                                                                                                                                                                                                                                                                                                                                                                                                                                                                                                                                                                                                                                                                                                                                                       | 138106 |
| (0300).md                                                                                                                                                                                                                                                                                                                                                                                                                                                                                                                                                                                                                                                                                                                                                                                                                                                                                                                                                                                                                                                                                                                                                                                                                                                                                                                                                                                                                                                                                                                                                                                                                                                                                                                      | 22437  |
| clinical trials/ or between groups design/                                                                                                                                                                                                                                                                                                                                                                                                                                                                                                                                                                                                                                                                                                                                                                                                                                                                                                                                                                                                                                                                                                                                                                                                                                                                                                                                                                                                                                                                                                                                                                                                                                                                                     | 11346  |
| ((singl* or doubl* or trebl* or tripl*) adj (blind* or dumm* or mask*)).tw                                                                                                                                                                                                                                                                                                                                                                                                                                                                                                                                                                                                                                                                                                                                                                                                                                                                                                                                                                                                                                                                                                                                                                                                                                                                                                                                                                                                                                                                                                                                                                                                                                                     | 24796  |
| PLACEBO/                                                                                                                                                                                                                                                                                                                                                                                                                                                                                                                                                                                                                                                                                                                                                                                                                                                                                                                                                                                                                                                                                                                                                                                                                                                                                                                                                                                                                                                                                                                                                                                                                                                                                                                       | 5203   |
| (placebo* or sham).tw                                                                                                                                                                                                                                                                                                                                                                                                                                                                                                                                                                                                                                                                                                                                                                                                                                                                                                                                                                                                                                                                                                                                                                                                                                                                                                                                                                                                                                                                                                                                                                                                                                                                                                          | 49768  |
| (randomized or randomised or randomly or rct).tw                                                                                                                                                                                                                                                                                                                                                                                                                                                                                                                                                                                                                                                                                                                                                                                                                                                                                                                                                                                                                                                                                                                                                                                                                                                                                                                                                                                                                                                                                                                                                                                                                                                                               | 134417 |
| trial.ti                                                                                                                                                                                                                                                                                                                                                                                                                                                                                                                                                                                                                                                                                                                                                                                                                                                                                                                                                                                                                                                                                                                                                                                                                                                                                                                                                                                                                                                                                                                                                                                                                                                                                                                       | 27289  |

|                                                                                                                                                                                                                                                                                                                                                                                                                                                                                                                                                                                                                                                                                                                                                                                                                                                                                                                                                                                                                                                                                                                                                                                                                                                                                                                                                                                                                                                                                                                                                                                                                                                                                                                                      |         |
|--------------------------------------------------------------------------------------------------------------------------------------------------------------------------------------------------------------------------------------------------------------------------------------------------------------------------------------------------------------------------------------------------------------------------------------------------------------------------------------------------------------------------------------------------------------------------------------------------------------------------------------------------------------------------------------------------------------------------------------------------------------------------------------------------------------------------------------------------------------------------------------------------------------------------------------------------------------------------------------------------------------------------------------------------------------------------------------------------------------------------------------------------------------------------------------------------------------------------------------------------------------------------------------------------------------------------------------------------------------------------------------------------------------------------------------------------------------------------------------------------------------------------------------------------------------------------------------------------------------------------------------------------------------------------------------------------------------------------------------|---------|
| or/14-20                                                                                                                                                                                                                                                                                                                                                                                                                                                                                                                                                                                                                                                                                                                                                                                                                                                                                                                                                                                                                                                                                                                                                                                                                                                                                                                                                                                                                                                                                                                                                                                                                                                                                                                             | 184438  |
| 5 and 10 and 13 and 21                                                                                                                                                                                                                                                                                                                                                                                                                                                                                                                                                                                                                                                                                                                                                                                                                                                                                                                                                                                                                                                                                                                                                                                                                                                                                                                                                                                                                                                                                                                                                                                                                                                                                                               | 208     |
| (exp animals/ or animal.po) not human.po                                                                                                                                                                                                                                                                                                                                                                                                                                                                                                                                                                                                                                                                                                                                                                                                                                                                                                                                                                                                                                                                                                                                                                                                                                                                                                                                                                                                                                                                                                                                                                                                                                                                                             | 351310  |
| 22 not 23                                                                                                                                                                                                                                                                                                                                                                                                                                                                                                                                                                                                                                                                                                                                                                                                                                                                                                                                                                                                                                                                                                                                                                                                                                                                                                                                                                                                                                                                                                                                                                                                                                                                                                                            | 207     |
| <b>Embase</b>                                                                                                                                                                                                                                                                                                                                                                                                                                                                                                                                                                                                                                                                                                                                                                                                                                                                                                                                                                                                                                                                                                                                                                                                                                                                                                                                                                                                                                                                                                                                                                                                                                                                                                                        |         |
| exp neoplasm/                                                                                                                                                                                                                                                                                                                                                                                                                                                                                                                                                                                                                                                                                                                                                                                                                                                                                                                                                                                                                                                                                                                                                                                                                                                                                                                                                                                                                                                                                                                                                                                                                                                                                                                        | 4036884 |
| exp hematopoietic stem cell transplantation/ or stem cell transplantation/ or stem cell mobilization/                                                                                                                                                                                                                                                                                                                                                                                                                                                                                                                                                                                                                                                                                                                                                                                                                                                                                                                                                                                                                                                                                                                                                                                                                                                                                                                                                                                                                                                                                                                                                                                                                                | 99776   |
| (cancer* or neoplas* or tumor* or malignan* or metasta* or oncogen* or oncolog* or hepatoma* or hepatoblastoma* or hepato-blastoma* or carcinoma* or adenoma? or adenocarcinoma? or adeno-carcinoma? or blastoma? or carcinosarcoma? or carcino-sarcoma? or leukemia? or leukaemia? or lymphoma? or melanoma? or mesenchymoma? or mesothelioma? or sarcoma? or thymoma?).tw,kw                                                                                                                                                                                                                                                                                                                                                                                                                                                                                                                                                                                                                                                                                                                                                                                                                                                                                                                                                                                                                                                                                                                                                                                                                                                                                                                                                       | 4421296 |
| (H SCT or ((h?ematopoietic or h?emato-poietic) adj3 (transplant* or sct or bct or mobili#ation)) or pbsct or pbct or psct or ((peripheral or pbsc or pbscs) adj3 transplant*) or autohct or autopbsct or autopbsc or autopsct or cbct or ((autologous or auto-logous or auto or allogeneic or allo-geneic or homologous or homo-logous) adj hct)).tw,kw                                                                                                                                                                                                                                                                                                                                                                                                                                                                                                                                                                                                                                                                                                                                                                                                                                                                                                                                                                                                                                                                                                                                                                                                                                                                                                                                                                              | 60106   |
| or/1-4                                                                                                                                                                                                                                                                                                                                                                                                                                                                                                                                                                                                                                                                                                                                                                                                                                                                                                                                                                                                                                                                                                                                                                                                                                                                                                                                                                                                                                                                                                                                                                                                                                                                                                                               | 5189214 |
| exp fear/                                                                                                                                                                                                                                                                                                                                                                                                                                                                                                                                                                                                                                                                                                                                                                                                                                                                                                                                                                                                                                                                                                                                                                                                                                                                                                                                                                                                                                                                                                                                                                                                                                                                                                                            | 228473  |
| exp Anxiety Disorder/                                                                                                                                                                                                                                                                                                                                                                                                                                                                                                                                                                                                                                                                                                                                                                                                                                                                                                                                                                                                                                                                                                                                                                                                                                                                                                                                                                                                                                                                                                                                                                                                                                                                                                                | 215071  |
| (anxiet* or stress disorder* or psychological trauma* or ptsd or ptsds or moral injur* or post trauma* or posttrauma* or (stress* adj2 trauma*)).tw,kw                                                                                                                                                                                                                                                                                                                                                                                                                                                                                                                                                                                                                                                                                                                                                                                                                                                                                                                                                                                                                                                                                                                                                                                                                                                                                                                                                                                                                                                                                                                                                                               | 318527  |
| (anxious* or fear or fears or fearful* or nervous* or angst or apprehensi* or panic* or phobic or phobia*).tw,kw                                                                                                                                                                                                                                                                                                                                                                                                                                                                                                                                                                                                                                                                                                                                                                                                                                                                                                                                                                                                                                                                                                                                                                                                                                                                                                                                                                                                                                                                                                                                                                                                                     | 495919  |
| or/6-9                                                                                                                                                                                                                                                                                                                                                                                                                                                                                                                                                                                                                                                                                                                                                                                                                                                                                                                                                                                                                                                                                                                                                                                                                                                                                                                                                                                                                                                                                                                                                                                                                                                                                                                               | 892945  |
| aromatherapy/ or moxibustion/ or reiki/ or shamanism/ or spiritual healing/ or exp acupuncture/ or exp biofeedback/ or qigong/ or breathing exercise/ or tai chi/ or yoga/ or movement therapy/ or hypnosis/ or guided imagery/ or meditation/ or mindfulness/ or psychodrama/ or kinesiotherapy/ or exp manipulative medicine/ or spiritual healing/ or art therapy/ or dance therapy/ or music therapy/                                                                                                                                                                                                                                                                                                                                                                                                                                                                                                                                                                                                                                                                                                                                                                                                                                                                                                                                                                                                                                                                                                                                                                                                                                                                                                                            | 146944  |
| ((mind? adj1 body) or acupunctur* or acupotom* or electroacupunctur* or electro-acupunctur* or moxibustion or moxabustion or shaman* or witch* or sorcer* or radiesthesi* or aroma therap* or aromatherap* or (essential adj2 oil*) or bio-feedback* or myo-feedback* or psycho-physiologic feedback* or neuro-feedback* or biofeedback* or myofeedback* or psychophysiological feedback* or neurofeedback* or alpha feedback* or brainwave feedback* or qigong or qi gong or ch'i kung or ((breath* or coping or respiratory) adj2 (exercise* or technique* or train*)) or relax* or hypnos#s or hypnotherap* or hypno-therap* or hypnotism or autogenic training or self-hypno* or imagery or reverie or laughter or laughing or meditat* or mindful* or psychodrama* or psycho-drama* or tai chi or tai ji or taiji or therapeutic touch* or healing touch* or reiki or yoga or energy therap* or ((musculoskeletal* or musculo-skeletal* or orthop?edic* or osteopathic* or spinal* or cervical* or lumbar*) adj2 manipul*) or ((manipulat* or manual) adj2 therap*) or chiropractic* or soft tissue therap* or acupressure* or chih ya or shiatsu or shiatzu or zhi ya or bodywork* or massag* or rolfing or zone therap* or reflex therap* or reflexolog* or reflexotherap* or reflexo-therap* or manual lymph* or ((spiritual or faith or mental* or religion* or religious*) adj3 (healing or heal or healed or heals)) or prayer* or magic* or body align* or pilates or movement technique* or alexander technique* or feldenkrais or structural integration* or trager approach* or psycho-physical integration* or psychophysical integration* or mentastic* or ((art or music) adj3 therap*) or dance or dancing).tw,kw | 357625  |
| or/11-12                                                                                                                                                                                                                                                                                                                                                                                                                                                                                                                                                                                                                                                                                                                                                                                                                                                                                                                                                                                                                                                                                                                                                                                                                                                                                                                                                                                                                                                                                                                                                                                                                                                                                                                             | 424914  |
| randomized controlled trial/                                                                                                                                                                                                                                                                                                                                                                                                                                                                                                                                                                                                                                                                                                                                                                                                                                                                                                                                                                                                                                                                                                                                                                                                                                                                                                                                                                                                                                                                                                                                                                                                                                                                                                         | 534337  |
| controlled clinical trial/                                                                                                                                                                                                                                                                                                                                                                                                                                                                                                                                                                                                                                                                                                                                                                                                                                                                                                                                                                                                                                                                                                                                                                                                                                                                                                                                                                                                                                                                                                                                                                                                                                                                                                           | 460240  |
| exp randomization/                                                                                                                                                                                                                                                                                                                                                                                                                                                                                                                                                                                                                                                                                                                                                                                                                                                                                                                                                                                                                                                                                                                                                                                                                                                                                                                                                                                                                                                                                                                                                                                                                                                                                                                   | 81310   |

|                                                                                                                                                                                                                                                                                                                                                                                                                                                                                                                                                                                                                                                                                                                                                                                                                                                                                                                                                                                                                                                                                                                                                                                                                                                                                                                                                                                                                                                                                                                                                                                                                                                                                                                                                                                                                          |         |
|--------------------------------------------------------------------------------------------------------------------------------------------------------------------------------------------------------------------------------------------------------------------------------------------------------------------------------------------------------------------------------------------------------------------------------------------------------------------------------------------------------------------------------------------------------------------------------------------------------------------------------------------------------------------------------------------------------------------------------------------------------------------------------------------------------------------------------------------------------------------------------------------------------------------------------------------------------------------------------------------------------------------------------------------------------------------------------------------------------------------------------------------------------------------------------------------------------------------------------------------------------------------------------------------------------------------------------------------------------------------------------------------------------------------------------------------------------------------------------------------------------------------------------------------------------------------------------------------------------------------------------------------------------------------------------------------------------------------------------------------------------------------------------------------------------------------------|---------|
| Double Blind Procedure/                                                                                                                                                                                                                                                                                                                                                                                                                                                                                                                                                                                                                                                                                                                                                                                                                                                                                                                                                                                                                                                                                                                                                                                                                                                                                                                                                                                                                                                                                                                                                                                                                                                                                                                                                                                                  | 157804  |
| Single Blind Procedure/                                                                                                                                                                                                                                                                                                                                                                                                                                                                                                                                                                                                                                                                                                                                                                                                                                                                                                                                                                                                                                                                                                                                                                                                                                                                                                                                                                                                                                                                                                                                                                                                                                                                                                                                                                                                  | 33834   |
| ((singl* or doubl* or trebl* or tripl*) adj (blind* or dumm* or mask*)).tw,kw                                                                                                                                                                                                                                                                                                                                                                                                                                                                                                                                                                                                                                                                                                                                                                                                                                                                                                                                                                                                                                                                                                                                                                                                                                                                                                                                                                                                                                                                                                                                                                                                                                                                                                                                            | 220973  |
| PLACEBO/                                                                                                                                                                                                                                                                                                                                                                                                                                                                                                                                                                                                                                                                                                                                                                                                                                                                                                                                                                                                                                                                                                                                                                                                                                                                                                                                                                                                                                                                                                                                                                                                                                                                                                                                                                                                                 | 329973  |
| (placebo* or sham).tw,kw                                                                                                                                                                                                                                                                                                                                                                                                                                                                                                                                                                                                                                                                                                                                                                                                                                                                                                                                                                                                                                                                                                                                                                                                                                                                                                                                                                                                                                                                                                                                                                                                                                                                                                                                                                                                 | 389415  |
| (randomized or randomised or randomly or rct).ab                                                                                                                                                                                                                                                                                                                                                                                                                                                                                                                                                                                                                                                                                                                                                                                                                                                                                                                                                                                                                                                                                                                                                                                                                                                                                                                                                                                                                                                                                                                                                                                                                                                                                                                                                                         | 1087493 |
| trial.ti                                                                                                                                                                                                                                                                                                                                                                                                                                                                                                                                                                                                                                                                                                                                                                                                                                                                                                                                                                                                                                                                                                                                                                                                                                                                                                                                                                                                                                                                                                                                                                                                                                                                                                                                                                                                                 | 262171  |
| or/12-21                                                                                                                                                                                                                                                                                                                                                                                                                                                                                                                                                                                                                                                                                                                                                                                                                                                                                                                                                                                                                                                                                                                                                                                                                                                                                                                                                                                                                                                                                                                                                                                                                                                                                                                                                                                                                 | 1578325 |
| 5 and 10 and 13 and 24                                                                                                                                                                                                                                                                                                                                                                                                                                                                                                                                                                                                                                                                                                                                                                                                                                                                                                                                                                                                                                                                                                                                                                                                                                                                                                                                                                                                                                                                                                                                                                                                                                                                                                                                                                                                   | 3754    |
| (exp animal/ or nonhuman/) NOT exp human/                                                                                                                                                                                                                                                                                                                                                                                                                                                                                                                                                                                                                                                                                                                                                                                                                                                                                                                                                                                                                                                                                                                                                                                                                                                                                                                                                                                                                                                                                                                                                                                                                                                                                                                                                                                | 6009924 |
| 25 not 26                                                                                                                                                                                                                                                                                                                                                                                                                                                                                                                                                                                                                                                                                                                                                                                                                                                                                                                                                                                                                                                                                                                                                                                                                                                                                                                                                                                                                                                                                                                                                                                                                                                                                                                                                                                                                | 3678    |
| <b>Scopus</b>                                                                                                                                                                                                                                                                                                                                                                                                                                                                                                                                                                                                                                                                                                                                                                                                                                                                                                                                                                                                                                                                                                                                                                                                                                                                                                                                                                                                                                                                                                                                                                                                                                                                                                                                                                                                            |         |
| TITLE-ABS-KEY(cancer* or neoplas* or tumor* or tumour* or malignan* or metasta* or oncogen* or oncolog* or hepatoma* or hepatoblastoma* or hepato-blastoma* or carcinoma* or adenoma* or adenocarcinoma* or adeno-carcinoma* or blastoma* or carcinosarcoma* or carcino-sarcoma* or leukemia* or leukaemia* or lymphoma* or melanoma* or mesenchymoma* or mesothelioma* or sarcoma* or thymoma* or HSCT or ((hematopoietic or hemato-poietic or haematopoietic or haemato-poietic) W/3 (transplant* or sct or bct or mobilization or mobilisation)) or pbsct or pbct or psct or ((peripheral or pbsc or pbscs) W/3 transplant*) or autohct or autopbsct or autopbsc or autopsct or cbset or ((autologous or auto-logous or auto or allogeneic or allo-geneic or homologous or homologous) W/1 hct))                                                                                                                                                                                                                                                                                                                                                                                                                                                                                                                                                                                                                                                                                                                                                                                                                                                                                                                                                                                                                      | 5343120 |
| TITLE-ABS-KEY(anxiet* or (stress W/1 disorder*) or (psychological W/1 trauma*) or ptsd or ptsds or (moral W/1 injur*) or (post W/1 trauma*) or posttrauma* or (stress* W/2 trauma*) or anxious* or fear or fears or fearful* or nervous* or angst or apprehensi* or panic* or phobic or phobia*)                                                                                                                                                                                                                                                                                                                                                                                                                                                                                                                                                                                                                                                                                                                                                                                                                                                                                                                                                                                                                                                                                                                                                                                                                                                                                                                                                                                                                                                                                                                         | 1663296 |
| TITLE-ABS-KEY((mind W/1 body) or acupunctur* or acupotom* or electroacupunctur* or electro-acupunctur* or moxibustion or moxabustion or shaman* or witch* or sorcer* or radiesthesi* or aroma therap* or aromatherap* or (essential W/2 oil*) or bio-feedback* or myo-feedback* or "psycho-physiologic feedback" or neuro-feedback* or biofeedback* or myofeedback* or "psychophysiologic feedback" or neurofeedback* or "alpha feedback" or "brainwave feedback" or qigong or "qi gong" or "ch'i kung" or ((breath* or coping or respiratory) W/2 (exercise* or technique* or train*)) or relax* or hypnos#s or hypnotherap* or hypno-therap* or hypnotism or "autogenic training" or self-hypno* or imagery or reverie or laughter or laughing or meditat* or mindful* or psychodrama* or psycho-drama* or "tai chi" or "tai ji" or taiji or (therapeutic W/1 touch*) or (healing W/1 touch*) or reiki or yoga or (energy W/1 therap*) or ((musculoskeletal* or musculo-skeletal* or orthopedic* or orthopaedic or osteopathic* or spinal* or cervical* or lumbar*) W/2 manipul*) or ((manipulat* or manual) W/2 therap*) or chiropractic* or "soft tissue therapy" or acupressure* or "chih ya" or shiatsu or shiatzu or "zhi ya" or bodywork* or massag* or rolfing or (zone N/1 therap*) or (reflex N/1 therap*) or reflexolog* or reflexotherap* or reflexo-therap* or (manual N/1 lymph*) or ((spiritual or faith or mental* or religion* or religious*) W/3 (healing or heal or healed or heals)) or prayer* or magic* or (body N/1 align*) or pilates or (movement N/1 technique*) or "alexander technique" or feldenkrais or "structural integration" or "trager approach" or "psycho-physical integration" or "psychophysical integration" or mentastic* or ((art or music) W/3 therap*) or dance or dancing) | 39730   |
| TITLE-ABS-KEY((clinic* w/1 trial*) OR (randomi* w/1 control*) OR (randomi* w/2 trial*) OR (random* w/1 assign*) OR (random* w/1 allocat*) OR (control* w/1 clinic*) OR (control* w/1 trial) OR placebo* OR (Quantitat* w/1 Stud*) OR (control* w/1 stud*) OR (randomi* w/1 stud*) OR (singl* w/1 blind*) or (singl* w/1 mask*) OR (doubl* w/1 blind*) OR (doubl* w/1 mask*) OR (tripl* w/1 blind*) OR (tripl* w/1 mask*) OR (trebl* w/1 blind*) OR (trebl* w/1 mask*)) AND NOT (SRCTYPE(b) OR SRCTYPE(k) OR SRCTYPE(p) OR SRCTYPE(r) OR SRCTYPE(d) OR DOCTYPE(ab) OR DOCTYPE(bk))                                                                                                                                                                                                                                                                                                                                                                                                                                                                                                                                                                                                                                                                                                                                                                                                                                                                                                                                                                                                                                                                                                                                                                                                                                        | 6440854 |

|                                                                                                                                                                      |     |
|----------------------------------------------------------------------------------------------------------------------------------------------------------------------|-----|
| OR DOCTYPE(ch) OR DOCTYPE(bz) OR DOCTYPE(cr) OR DOCTYPE(ed) OR DOCTYPE(er) OR DOCTYPE(le) OR DOCTYPE(no) OR DOCTYPE(pr) OR DOCTYPE(rp) OR DOCTYPE(re) OR DOCTYPE(sh) |     |
| #1 AND #2 AND #3 AND #4                                                                                                                                              | 254 |

\*The numbers of citations reflect the result of the initial search which was conducted in Feb, 2019. The search was updated in May 10, 2019

**eTable 2. Self-report Anxiety Assessment Scales Used in the Included Trials<sup>a</sup> (n=28)**

| <b>Anxiety Scale Name</b>                     | <b>Number of Studies</b> | <b>Range of Scores</b> | <b>Higher Score Interpretation</b> |
|-----------------------------------------------|--------------------------|------------------------|------------------------------------|
| Hospital Anxiety and Depression Scale-Anxiety | 5                        | 0-21                   | More anxiety                       |
| State Trait Anxiety Inventory                 | 5                        | 20-80                  | More anxiety                       |
| Profile of Mood States (anxiety subscale)     | 3                        | 0-36                   | More anxiety                       |
| Symptom Checklist-90-Revised (anxiety scale)  | 3                        | NA                     | More anxiety                       |
| Self-Rating Anxiety Scale                     | 2                        | 20-80                  | More anxiety                       |
| Beck Anxiety Inventory                        | 1                        | 0-63                   | More anxiety                       |
| Depression, anxiety and stress scale          | 1                        | 0-20                   | More anxiety                       |
| Generalized Anxiety Disorder Scale            | 1                        | 0-21                   | More anxiety                       |
| Hamilton Anxiety Rating Scale                 | 1                        | 0-56                   | More anxiety                       |
| Personality Assessment Inventory              | 1                        | NA                     | More anxiety                       |
| Prostate Specific Anxiety Scale               | 1                        | NA                     | More anxiety                       |
| Visual Analog Scale                           | 1                        | 0-10                   | More anxiety                       |

<sup>a</sup> Does not add to 28 as anxiety outcome is not reported by all the included studies  
Abbreviations: NA-not available



**eTable 3. Self-report Depression Assessment Scales Used in the Included Trials<sup>a</sup>  
(n=28)**

| <b>Depression Scale Name</b>                        | <b>Number of Studies</b> | <b>Range of Scores</b> | <b>Higher Score Interpretation</b> |
|-----------------------------------------------------|--------------------------|------------------------|------------------------------------|
| Hospital Anxiety and Depression Scale               | 5                        | 0-21                   | More depression                    |
| Center for Epidemiological Studies Depression Scale | 4                        | 0-60                   | More depression                    |
| Profile of Mood States (depression subscale)        | 3                        | 0-36                   | More depression                    |
| Symptom Checklist-90-Revised (depression scale)     | 3                        | NA                     | More depression                    |
| Self-Rating Depression Scale                        | 2                        | 20-80                  | More depression                    |
| Depression, anxiety and stress scale (DASSI 21)     | 1                        | 0-42                   | More depression                    |
| Hamilton Rating Scale for Depression                | 1                        | 0-50                   | More depression                    |
| Personality Assessment Inventory                    | 1                        | NA                     | More depression                    |
| Personal Health Questionnaire Depression Scale      | 1                        | 0-24                   | More depression                    |

<sup>a</sup>Does not add to 28 as anxiety outcome is not reported by all the included studies  
Abbreviations: NA-not available

**eTable 4. Self-report Health-related Quality of Life Assessment Scales Used in the Included Trials<sup>a</sup> (n=28)**

| <b>Health-related Quality of Life Scale Name</b>                                   | <b>Number of Studies</b> | <b>Range of Scores</b> | <b>Higher Score Interpretation</b> |
|------------------------------------------------------------------------------------|--------------------------|------------------------|------------------------------------|
| European Organization for Research and Treatment of Cancer QLQ-C30 (overall score) | 4                        | 0-100                  | Better quality of life             |
| Functional Assessment of Cancer Therapy-Breast (FACT-B) (overall score)            | 2                        | NA                     | Better quality of life             |
| 36-Item Short Form Survey (SF-36) (general health)                                 | 2                        | 0-100                  | Better quality of life             |
| 5-item World Health Organization Well-Being Index (WHO-5) (overall score)          | 2                        | 0-100                  | Better quality of life             |
| Functional Assessment of Cancer Therapy-Breast (FACT-G) (overall score)            | 1                        | NA                     | Better quality of life             |
| Functional Assessment of Cancer Therapy-Breast (FACT-G) (overall score)            | 1                        | NA                     | Better quality of life             |

<sup>a</sup> Does not add to 28 as anxiety outcome is not reported by all the included studies  
Abbreviations: NA-not available

**eFigure 1. Summary of the risk of bias of studies included in the systematic review (n= 28)**

|                  | Random sequence generation (selection bias) | Allocation concealment (selection bias) | Blinding of participants and personnel (performance bias) | Blinding of outcome assessment (detection bias) | Incomplete outcome data (attrition bias) | Selective reporting (reporting bias) | Other bias |
|------------------|---------------------------------------------|-----------------------------------------|-----------------------------------------------------------|-------------------------------------------------|------------------------------------------|--------------------------------------|------------|
| Blaes 2016       | ?                                           | ?                                       | -                                                         | -                                               | ?                                        | ?                                    | ?          |
| Bower 2015       | ?                                           | ?                                       | -                                                         | -                                               | ?                                        | +                                    | +          |
| Branstrom 2010   | +                                           | ?                                       | -                                                         | -                                               | -                                        | +                                    | +          |
| Chambers 2017    | +                                           | +                                       | -                                                         | -                                               | ?                                        | +                                    | +          |
| Compen(a) 2018   | +                                           | +                                       | -                                                         | -                                               | ?                                        | +                                    | +          |
| Compen(b) 2018   | +                                           | +                                       | -                                                         | -                                               | ?                                        | +                                    | +          |
| Foley 2010       | +                                           | +                                       | -                                                         | -                                               | ?                                        | -                                    | ?          |
| Franco 2019      | +                                           | ?                                       | -                                                         | -                                               | ?                                        | -                                    | ?          |
| Henderson 2013   | ?                                           | ?                                       | -                                                         | -                                               | ?                                        | -                                    | ?          |
| Hoffman 2012     | +                                           | +                                       | -                                                         | -                                               | +                                        | +                                    | +          |
| Jang 2016        | ?                                           | ?                                       | -                                                         | -                                               | +                                        | +                                    | +          |
| Johannsen 2016   | +                                           | +                                       | -                                                         | -                                               | -                                        | +                                    | +          |
| Johns 2015       | +                                           | ?                                       | -                                                         | -                                               | +                                        | ?                                    | +          |
| Kenne 2017       | +                                           | +                                       | -                                                         | -                                               | +                                        | +                                    | +          |
| Kingston 2015    | +                                           | ?                                       | -                                                         | -                                               | ?                                        | +                                    | +          |
| Lengacher 2009   | ?                                           | ?                                       | -                                                         | -                                               | +                                        | ?                                    | +          |
| Lengacher 2016   | +                                           | ?                                       | -                                                         | -                                               | +                                        | +                                    | ?          |
| Lerman 2012      | ?                                           | ?                                       | -                                                         | -                                               | -                                        | ?                                    | +          |
| Liu 2019         | +                                           | +                                       | -                                                         | -                                               | ?                                        | +                                    | +          |
| Lorca 2018       | ?                                           | ?                                       | -                                                         | ?                                               | ?                                        | ?                                    | -          |
| Monti 2006       | +                                           | ?                                       | -                                                         | -                                               | ?                                        | +                                    | +          |
| Russell 2018     | +                                           | +                                       | -                                                         | -                                               | -                                        | +                                    | +          |
| Schellekens 2016 | +                                           | +                                       | -                                                         | -                                               | -                                        | +                                    | +          |
| Specia 2000      | +                                           | ?                                       | -                                                         | -                                               | -                                        | +                                    | +          |
| Vaziri 2017      | ?                                           | ?                                       | -                                                         | -                                               | -                                        | +                                    | ?          |
| Wurtzen 2013     | +                                           | +                                       | -                                                         | -                                               | ?                                        | ?                                    | +          |
| Zernicke 2014    | +                                           | +                                       | -                                                         | -                                               | ?                                        | +                                    | +          |
| Zhang (a) 2017   | +                                           | ?                                       | -                                                         | -                                               | +                                        | +                                    | +          |
| Zhang (b) 2017   | +                                           | ?                                       | -                                                         | -                                               | +                                        | +                                    | +          |

**eFigure 2. Funnel plot “trim and fill” technique assessing publication bias for short-term reduction in severity of anxiety.** The x-axis represents the standard difference in means for the effect of mindfulness-based intervention. Estimated number of missing studies on left side = 8 (solid dots)

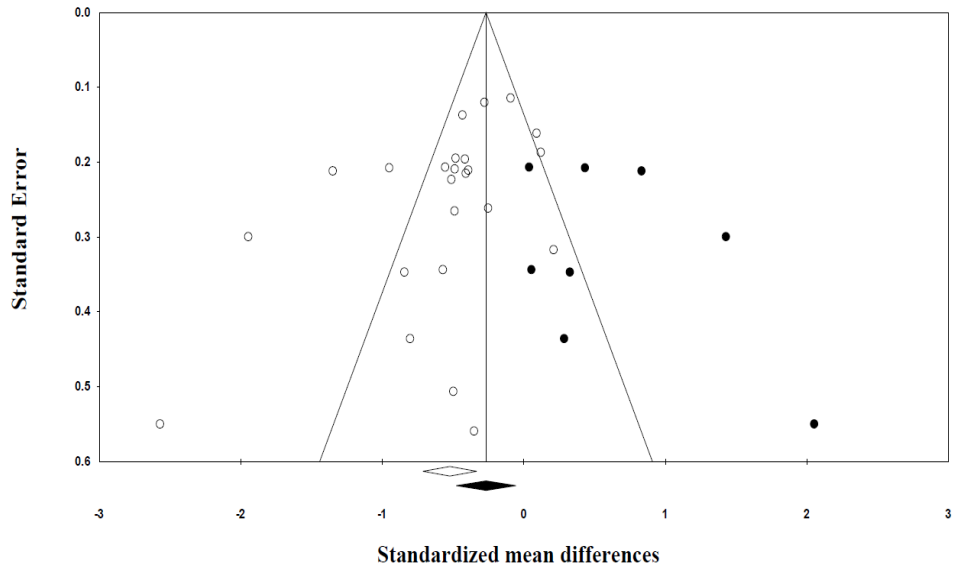

Supplement: jamanetwopen-3-e2012598-s001.pdf [file jamanetwopen-3-e2012598-s001.pdf]
